# Supplementary material
Source: PubMed Central journal article supplement (PMC2823414)
Supplement: supp_M109.000810_jbc.M109.000810-2.pdf [file supp_M109.000810_jbc.M109.000810-2.pdf]

**Supplemental Table S1**

**Rates of anaerobic flavin reduction of nNOS<sub>red</sub> proteins by single molar equivalent NADPH at 600 nm.** Reductions by a single molar equivalent of NADPH were carried out in the stopped-flow apparatus at 10 °C while monitoring the absorbance changes at 600 nm as described under "Experimental Procedures." All rates are the result of fitting absorbance changes to a single exponential function.

| <b>Sample Type</b> | <b>Initial phase</b><br>s <sup>-1</sup> | <b>Slow phase</b><br>s <sup>-1</sup> |
|--------------------|-----------------------------------------|--------------------------------------|
| Wild type -CaM     | 23.6 ± 0.27                             | 0.062 ± 0.0007                       |
| K842E - CaM        | 92 ± 3                                  | 0.08 ± 0.002                         |
